# Supplementary material for: Incidence of Type 2 Diabetes Using Proposed HbA1c Diagnostic Criteria in the European Prospective Investigation of Cancer–Norfolk Cohort: Implications for preventive strategies
Source: PubMed Central journal article supplement — Diabetes Care. 2011 Mar 21;34(4):950–6. doi: 10.2337/dc09-2326 (PMC3064056; doi:10.2337/dc09-2326), 2011-03-21
Supplement: supp_dc09-2326v092326_DC092326SupplementaryData.pdf [file supp_dc09-2326v092326_DC092326SupplementaryData.pdf]

|                                                           | Total           | HbA <sub>1c</sub> level |                 |                  |                    | p-value for trend |
|-----------------------------------------------------------|-----------------|-------------------------|-----------------|------------------|--------------------|-------------------|
|                                                           |                 | < 5.0%                  | 5.0 – 5.4%      | 5.5 – 5.9%       | 6.0 – 6.4%         |                   |
| <b>Clinically diagnosed diabetes</b>                      |                 |                         |                 |                  |                    |                   |
| Number (% of total participants)                          | 5,735           | 1,849 (32%)             | 2,119 (37%)     | 1,397 (24%)      | 370 (6%)           |                   |
| Incident cases (% of total cases)                         | 22              | 3 (14%)                 | 2 (9%)          | 9 (41%)          | 8 (36%)            |                   |
| 3-yr cumulative incidence (%)                             | 0.4 (0.2 – 0.5) | 0.2 (0.1 – 0.5)         | 0.1 (0.0 – 0.4) | 0.6 (0.3 – 1.2)  | 2.2 (1.1 – 4.3)    |                   |
| Unadjusted OR                                             |                 | 1.0                     | 0.6 (0.1 – 3.5) | 4.0 (1.1 – 14.8) | 13.6 (3.6 – 51.5)  | <0.001            |
| Age-adjusted OR                                           |                 | 1.0                     | 0.6 (0.1 – 3.7) | 4.4 (1.2 – 17.0) | 15.7 (3.9 – 63.3)  | <0.001            |
| Age- and sex-adjusted OR                                  |                 | 1.0                     | 0.6 (0.1 – 3.6) | 4.3 (1.1 – 16.4) | 15.2 (3.8 – 60.8)  | <0.001            |
| Multivariable-adjusted OR*                                |                 | 1.0                     | 0.6 (0.1 – 3.7) | 4.5 (1.1 – 18.0) | 17.7 (4.0 – 78.9)  | <0.001            |
| <b>Clinically and/or biochemically diagnosed diabetes</b> |                 |                         |                 |                  |                    |                   |
| Number (% of total participants)                          | 5,735           | 1,849 (32%)             | 2,119 (37%)     | 1,397 (24%)      | 370 (6%)           |                   |
| Incident cases (% of total cases)                         | 59              | 5 (8%)                  | 13 (22%)        | 16 (27%)         | 25 (42%)           |                   |
| 3-yr cumulative incidence (%)                             | 1.0 (0.8 – 1.3) | 0.3 (0.1 – 0.6)         | 0.6 (0.4 – 1.1) | 1.1 (0.7 – 1.8)  | 6.8 (4.6 – 9.8)    |                   |
| Unadjusted OR                                             |                 | 1.0                     | 2.3 (0.8 – 6.4) | 4.3 (1.6 – 11.7) | 26.7 (10.2 – 70.3) | < 0.001           |
| Age-adjusted OR                                           |                 | 1.0                     | 2.4 (0.8 – 6.7) | 4.6 (1.6 – 12.7) | 29.3 (10.8 – 79.5) | < 0.001           |
| Age- and sex-adjusted OR                                  |                 | 1.0                     | 2.3 (0.8 – 6.6) | 4.5 (1.6 – 12.5) | 28.8 (10.6 – 78.2) | < 0.001           |
| Multivariable-adjusted OR*                                |                 | 1.0                     | 2.3 (0.8 – 6.6) | 4.4 (1.6 – 12.4) | 27.2 (9.8 – 75.9)  | < 0.001           |

**Online Appendix Table 1. Incidence and relative risk (odds ratio) of diabetes (restricted definition) over 3 years by baseline HbA<sub>1c</sub> categories in the EPIC-Norfolk cohort (n=5,735),** restricted definition of diabetes: participants were not classified as having incident diabetes unless a self-reported diagnosis was supported by information on diabetes specific medication or confirmed by information from clinical records, death certificates or HbA<sub>1c</sub>. \* adjusted for age, sex, social class, self-reported family history of diabetes, smoking, use of corticosteroids and anti-hypertensive drugs, body mass index, waist circumference, systolic blood pressure, cholesterol, HDL-cholesterol and triglyceride
